# Supplementary material for: Cyclic β-(1→3) (1→6) glucan/carrageenan hydrogels for wound healing applications
Source: Royal Society of Chemistry journal article supplement (doi:10.1039/c6ra23386d), 2016-01-01
Supplement: c6ra23386d1.pdf [file c6ra23386d1.pdf]

Supplementary Material:

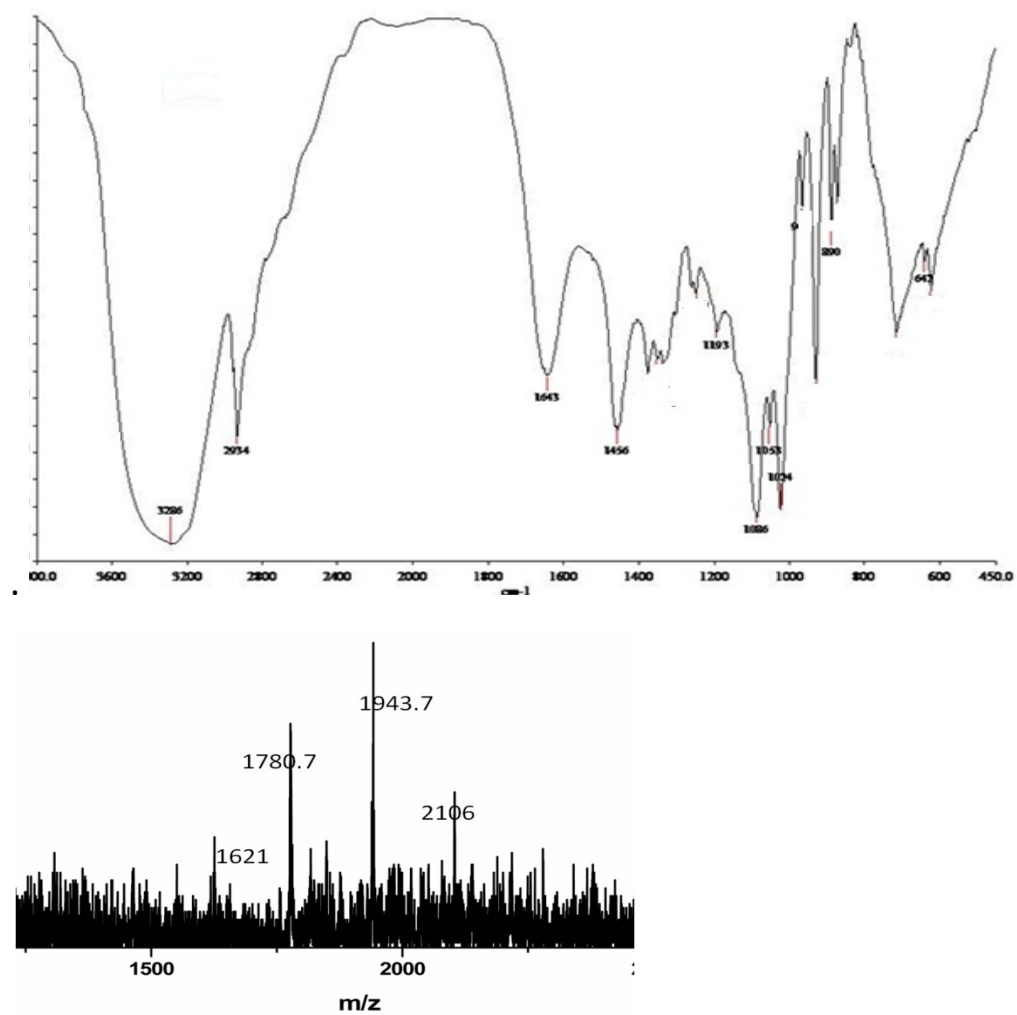

Fig S1: FT-IR spectrum and MALDI-TOF spectrum (negative mode) of cyclic  $\beta$ -(1 $\rightarrow$ 3)1 $\rightarrow$ 6) glucan

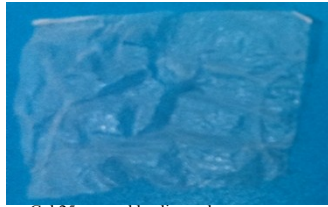

Gel 25- wound healing gel

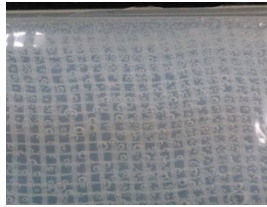

Commercial - ReliHeal® -

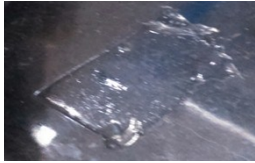

Gel 25- wound healing gel, Swollen in

Fig S2 CBG/ Carageenan hydrogels and commercial hydrogel ReliHeal-Optima

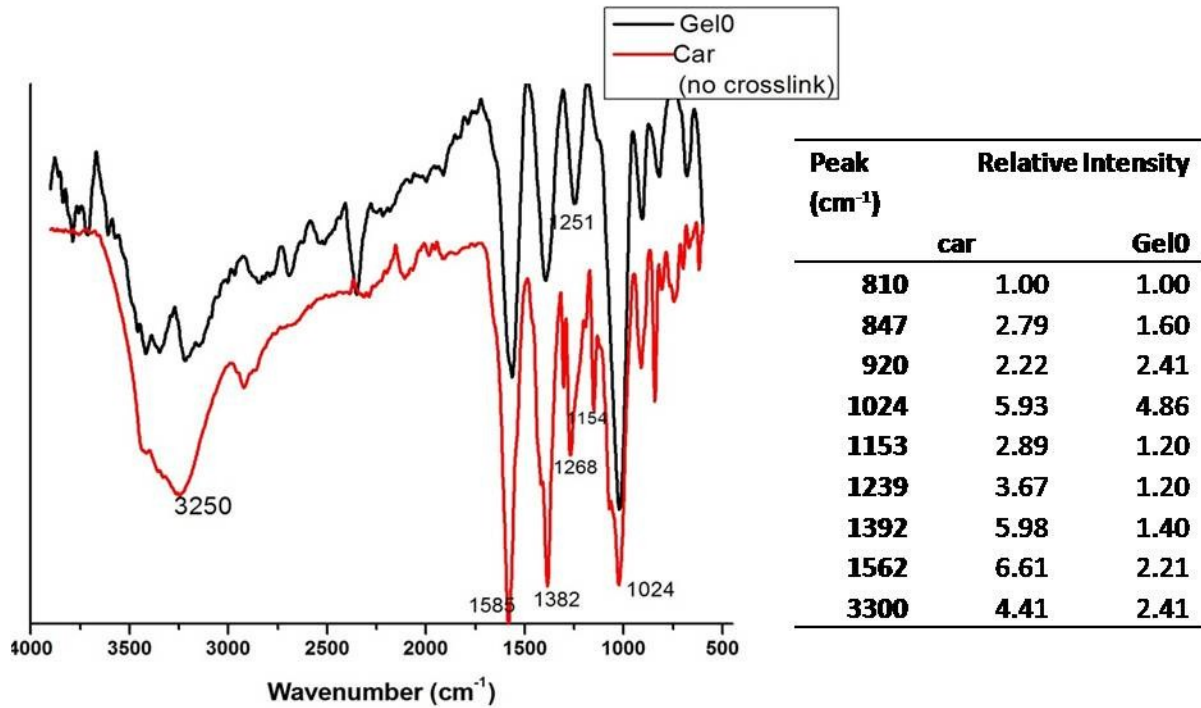

Fig S3: FTIR spectrum carrageenan and crosslinked carrageenan (Gel0) and relative absorbance intensity of the characteristic peaks with respect to 810 cm<sup>-1</sup>

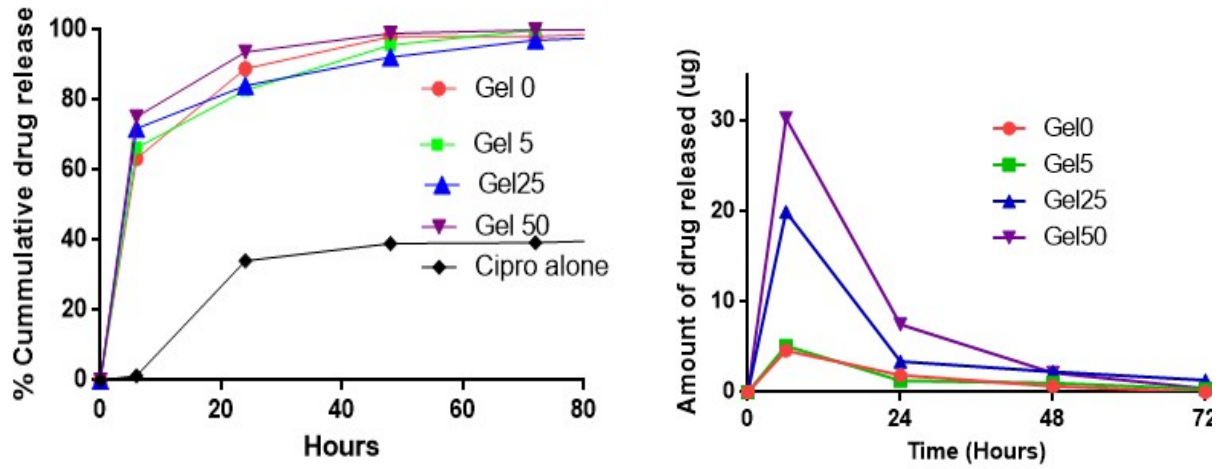

Fig S4: a) Cumulative percentage of drug (Ciprofloxacin) released from the hydrogels b) Actual amount of drug released into the medium

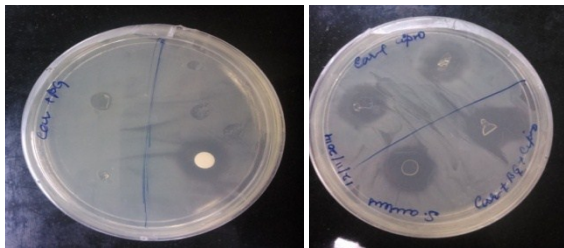

Fig S5: Antibacterial activity of the ciprofloxacin loaded hydrogel Gel 0 and Gel25 on *S.aureus* by disc diffusion method

**Table S1: Characteristic IR peak and the relative band intensities of CBG/Car hydrogel without crosslink (5:95) and crosslinked hydrogels (Gel0, Gel5, Gel25, Gel50). The relative absorbance intensities were determined by normalizing the functional group peaks with sulfate (C-O-SO<sub>3</sub>) group linked to the 3,6-anhydrogalactose ring (802 cm<sup>-1</sup>).**

| Peak<br>(cm <sup>-1</sup> ) | Relative Absorbance Intensity |                 |      |       |       |
|-----------------------------|-------------------------------|-----------------|------|-------|-------|
|                             | Gel0                          | No<br>crosslink | Gel5 | Gel25 | Gel50 |
| 810                         | 1.00                          | 1.00            | 1.00 | 1.00  | 1.00  |
| 847                         | 1.60                          | 2.15            | 1.25 | 1.54  | 1.16  |
| 920                         | 2.41                          | 1.14            | 1.75 | 1.89  | 1.50  |
| 1024                        | 4.86                          | 4.33            | 3.92 | 3.51  | 2.72  |
| 1153                        | 1.20                          | 3.75            | 1.37 | 1.1   | 1.19  |
| 1239                        | 1.20                          | 6.10            | 1.25 | 1.21  | 1.25  |
| 1392                        | 1.40                          | 9.41            | 2.00 | 1.34  | 1.21  |
| 1562                        | 2.21                          | 9.87            | 2.50 | 1.63  | 1.27  |
| 3300                        | 2.41                          | 4.92            | 2.25 | 1.86  | 1.50  |

**Table S2: List of Primers used for RT-PCR**

|   |              | Primers |                            |
|---|--------------|---------|----------------------------|
| 1 | IL-1b        | Forward | GACCTGCTAGTGTGTGATGTTTC    |
|   |              | Reverse | CAGCACGAGGCATTTTTGTTGT     |
| 2 | IL-1a        | Forward | AAGACAAGCCTGTGTTGCTGAAGG   |
|   |              | Reverse | TCCCAGAAGAAAATGAGGTCGGTC   |
| 3 | IL6          | Forward | ACAGCCACTGCCTTCCTACTT      |
|   |              | Reverse | CAAGATCTCCCTGAGAACATATG    |
| 4 | TNF-a        | Forward | CCACACCGTCAGCCGATT         |
|   |              | Reverse | TCCTTAGGGCAAGGGCTCTT       |
| 5 | IFN $\gamma$ | Forward | AACAGTAAAGCAAAAAAGGATGCATT |
|   |              | Reverse | TTCATTGACAGCTTTGTGCTGG     |
| 6 | IL-10        | Forward | CGACGCTGTCATCGATTCT        |
|   |              | Reverse | ATGGCCTTGTTAGACACCTTTGT    |
